# Supplementary material
Source: PubMed Central journal article supplement (PMC1690167)
Supplement: 10467742s01.pdf [file 10467742s01.pdf]

This is an appendix to the paper by Imamura *et al.* 1999 Restoration of ocular dominance plasticity mediated by adenosine 3',5'-monophosphate in adult visual cortex. *Proc. R. Soc. Lond. B* **266**,1507–1516.

Electronic appendices are refereed with the paper. However, no attempt has been made to impose a uniform editorial style on the electronic appendix.

## **APPENDIX A**

### **4. DISCUSSION**

#### **(e) *Alternative mechanisms***

$\beta$ -adrenoreceptors are found in both neurons and astrocytes in visual cortex (Hansson, 1988; Stone and Ariano, 1989; Aoki, 1992). Liu et al. (1993) reported that in adult visual cortex more than half the cells immunoreactive with an anti- $\beta$ -adrenoreceptor antibody were astrocytes. It is, therefore, likely that directly infused agonists activate  $\beta$ -adrenoreceptors to increase the intracellular cAMP pool in both neurons and astrocytes. Indeed, an inhibitor of metabolic activity of glial cells injected in kitten visual cortex reduced ODP significantly (Imamura et al., 1993). It was also reported that supplementing adult visual cortex with astrocytes, cultured from visual cortex of newborn kittens, partly reinstated ODP in adult cats (Müller and Best, 1989). In short, it is likely that enhanced ODP in the present study was partly mediated by an increase in glial cAMP.

Agonist-induced accumulation of cAMP in neocortex can be detected by *in vivo* microdialysis, suggesting that the extracellular concentration of cAMP may reflect the intracellular one. Type-I adenylate cyclase which is linked to  $\beta$ -adrenoreceptors contains 12 transmembrane domains that may constitute a multi-drug transporter (Krupinski et al., 1989). It is hypothesized that through this transporter cAMP accumulated inside cells overflows to the outside (Rosenberg, 1992; Rosenberg and Li, 1995). Therefore, it likely plays some roles in ODP, for example, after its degradation to adenosine or related bioactive substances (Rosenberg et al., 1994). Specifically localized extracellular kinase is indeed known to phosphorylate extracellular proteins in hippocampal long-term potentiation (Chen et al., 1996).

## REFERENCES

- Aoki, C. 1992  $\beta$ -Adrenergic receptors: astrocytic localization in the adult visual cortex and their relation to catecholamine axon terminals as revealed by electron microscopic immunocytochemistry. *J. Neurosci.* **12**, 781-792.
- Chen, W., Wieraszko, A., Hogan, M.V., Yang, H.-A., Kornecki, E. & Ehrlich, Y.H. 1996 Surface protein phosphorylation by ecto-protein kinase is required for the maintenance of hippocampal long-term potentiation. *Proc. Natl. Acad. Sci. USA* **93**, 8688-8693.
- Hansson, E. 1988 Astroglia from defined brain regions as studied with primary cultures. *Prog. Neurobiol.* **30**, 369-397.
- Imamura, K., Mataga, N. & Watanabe, Y. 1993 Gliotoxin-induced suppression of ocular dominance plasticity in kitten visual cortex. *Neurosci. Res.* **16**, 117-124.
- Krupinski, J., Coussen, F., Bakalyar, H. A., Tang, W.-J., Feinstein, P. G., Orth, K., Slaughter, C., Reed, R. R. & Gilman, A. G. 1989 Adenylyl cyclase amino acid sequence: Possible channel- or transporter-like structure. *Science* **244**, 1558-1564.
- Liu, Y., Jia, W., Strosberg, A. D. & Cynader, M. 1993 Development and regulation of  $\beta$ -adrenergic receptors in kitten visual cortex: an immuno-cytochemical and autoradiographic study. *Brain Res.* **632**, 274-286.
- Müller, C. & Best, J. 1989 Ocular dominance plasticity in adult cat visual cortex after transplantation of cultured astrocytes. *Nature* **342**, 427-430.
- Rosenberg, P. A. 1992 Functional significance of cyclic AMP secretion in cerebral cortex. *Brain Res. Bull.* **29**, 315-318.

Rosenberg, P. A., Knowles, R., Knowles, K. P. & Li, Y. 1994  $\beta$ -Adrenergic receptor-mediated regulation of extracellular adenosine in cerebral cortex in culture. *J. Neurosci.* **14**, 2953-2965.

Stone, E. A. & Ariano, M. A. 1989 Are glial cells targets of the central noradrenergic system? A review of the evidence. *Brain Res. Rev.* **14**, 297-309.
